# Supplementary material for: Intranasal Oxytocin Enhances Connectivity in the Neural Circuitry Supporting Social Motivation and Social Perception in Children with Autism
Source: PubMed Central journal article supplement (PMC5109935; doi:10.1038/srep35054), 2016-11-15
Supplement: srep35054-s1.pdf [file srep35054-s1.pdf]

## **Supplementary Material**

# **Intranasal Oxytocin Enhances Connectivity in the Neural Circuitry Supporting Social Motivation and Social Perception in Children with Autism**

**Ilanit Gordon<sup>1,2\*†</sup>, Allison Jack<sup>3\*†</sup>, Charlotte M. Pretzsch<sup>1</sup>, Brent Vander Wyk<sup>1</sup>, James F. Leckman<sup>1</sup>, Ruth Feldman<sup>1,2</sup>, & Kevin A. Pelphrey<sup>3</sup>**

†Authors contributed equally to this work.

<sup>1</sup>Yale University

<sup>2</sup>Bar-Ilan University

<sup>3</sup>George Washington University

\*Correspondence to: Dr. Ilanit Gordon, [ilush.gordon@gmail.com](mailto:ilush.gordon@gmail.com), Ramat-Gan, Bar Ilan University, and to Dr. Allison Jack, [allisonjack@gwu.edu](mailto:allisonjack@gwu.edu), Washington, D.C., George Washington University.

## Supplementary Results

**Biological motion.** Whole brain analyses were conducted to identify regions displaying a preferential response to coherent (BIO) versus scrambled (SCRAM) biological motion under either oxytocin (OT) or placebo (PLC) alone.  $Z$ -statistic images were thresholded using clusters determined by  $Z > 2.3$  and a (corrected) cluster significance threshold of  $p = 0.05$ .

In examining BIO > SCRAM response under OT alone, we identified significant clusters of activation with peaks in cuneus, middle temporal gyrus, supplementary motor cortex, and supramarginal gyrus. See Table S3 and Fig. S1A. For BIO > SCRAM response under PLC alone, we identified significant clusters of activation with peaks in right supramarginal gyrus, brainstem, left supramarginal gyrus, left occipital pole, and left lateral occipital cortex. See Table S3 and Fig. S1B.

**Affective voices.** Whole brain analyses were conducted to identify regions displaying a preferential response to happy (HAP) versus angry (ANG) nonword vocalizations under either OT or PLC alone.  $Z$ -statistic images were thresholded using clusters determined by  $Z > 2.3$  and a (corrected) cluster significance threshold of  $p = 0.05$ .

**HAP > ANG.** Under oxytocin alone, for the HAP > ANG contrast, we identified clusters of activation with peaks in right planum temporale and left Heschl's Gyrus. See Table S4 and Fig. S2A. Under PLC alone, we identified a significant cluster in right lateral occipital cortex. See Table S4 and Fig. S2B.

**ANG > HAP.** Under oxytocin alone, for the ANG > HAP contrast, we identified clusters of activation with peaks in the left callosal body, right precuneus, and right hippocampus. See Table S4 and Fig. S3. No significant results emerged for the ANG > HAP contrast under PLC.

### Supplementary Tables

**Table S1.** Summary of functional imaging studies in oxytocin published between 2013-2016. A literature search using the Medline, EMBASE, and PsychINFO databases was performed. The following inclusion criteria were used: humans; English language and publication date from January 1, 2013 until April 15, 2016. The search terms used were “exp functional magnetic resonance imaging” AND “oxytocin/ih, na [Inhalational Drug Administration, Intranasal Drug Administration]”. The explode (exp) function allowed us to retrieve results containing subject headings together with narrower and more specific subheadings. For “functional magnetic resonance imaging”, these included chemical shift imaging; chemical shift imagings; functional mri; functional mris; functional magnetic resonance imaging; imaging, chemical shift; imaging, magnetic resonance; imaging, nmr; imagings, chemical shift; mr tomography; mri, functional; mri scan; mri scans; mris, functional; magnetic resonance imaging, functional; magnetic resonance imaging; magnetization transfer contrast imaging; nmr imaging; nmr tomography; proton spin tomography; scan, mri; scans, mri; shift imaging, chemical; shift imagings, chemical; tomography, mr; tomography, nmr; tomography, proton spin; zeugmatography; fmri. All extracted abstracts were reviewed for relevance to the question. Review articles, opinion pieces, and perspective papers were excluded.

| Reference              | Design | Paradigm/stimulus                           | Dose  | Timing       | Subjects*                                                    | Main Findings                                                                                              |
|------------------------|--------|---------------------------------------------|-------|--------------|--------------------------------------------------------------|------------------------------------------------------------------------------------------------------------|
| Andari et al. (2016)   | BS     | Interactive ball game, Face-matching task   | 24 IU | 30-45 min    | 20 (adults with ASD)                                         | ↑Occ Lobe (faces vs shapes), mOFC (fair); ↓INS (unfair), AMYG/HPPC (based on social context)               |
| Ebner et al. (2016)    | BS     | Resting state                               | 24 IU | 70-90 min    | 79                                                           | ↑FC: AMYG –mPFC (Oxy>Plc, M>F)                                                                             |
| Eckstein et al. (2016) | BS     | Pavlovian fear conditioning                 | 24IU  | 30 min       | 97                                                           | ↑CC subregions                                                                                             |
| Frijling et al. (2016) | BS, WS | Neutral/trauma-script driven imagery        | 40 IU | 55-80 min    | 37 (adults; 11 days post-trauma)                             | ↑FC: AMYG-INS; ↓FC: AMYG-vmPFC (regardless of imagery)                                                     |
| Nawijn et al. (2016)   | WS     | Monetary incentive delay (MID) task         | 40 IU | 50-75 min    | 72 (adults with PTSD and trauma-exposed adults without PTSD) | ↑STR, ACC, INS (to reward/loss anticip.)                                                                   |
| Aoki et al. (2015)     | WS, CO | Facial (non)verbal socio-emotional paradigm | 24 IU | 40 min       | 40 (male adults with HF ASD)                                 | ↑vmPFC (rel. to NAA levels)                                                                                |
| Eckstein et al. (2015) | BS     | Pavlovian fear conditioning                 | 24 IU | 30 min       | 62                                                           | ↑PFC (cond. fear in early extinct. phase), ↓AMYG (across phases)                                           |
| Feng et al. (2015)     | BS     | Iterated Prisoner’s Dilemma game            | 24 IU | Not reported | 304                                                          | ↑CPU (male), ↓CPU (female)                                                                                 |
| Feng et al. (2015)     | BS     | Prisoner’s Dilemma task                     | 24 IU | Not reported | 204                                                          | ↑vCN (reciprocated coop. in men), ↓vCN (reciproc. coop. in women); effects specific to rs53576 GG genotype |

|                         |        |                                                                                          |                                                    |                |                                                        |                                                                                                                |
|-------------------------|--------|------------------------------------------------------------------------------------------|----------------------------------------------------|----------------|--------------------------------------------------------|----------------------------------------------------------------------------------------------------------------|
| Feng et al. (2015)      | BS     | Prisoner's Dilemma game                                                                  | 24 IU                                              | Not reported   | 153 (men)                                              | Intranasal Oxy did not interact with neuroticism to influence neural response to pos./neg. social interactions |
| Kanat et al. (2015)     | BS     | Emotional/neutral eyes and faces                                                         | 24 IU                                              | 55 min         | 50 (men)                                               | ↓AMYG (masked fearful eye whites)                                                                              |
| Kovács et al. (2015)    | BS     | Resting state                                                                            | ~35 IU 4.6 times/week for ~9 weeks (off-label use) | N/A            | 82 (41 Oxy users and 41 matched controls)              | ↑FC: AMYG-ACC                                                                                                  |
| Kumar et al. (2015)     | CO     | Resting state                                                                            | 24 IU                                              | 45 min         | 15 (men)                                               | ↓Degr. central.: PREC, ↓FC: bilat. AMYG, PREC-bilat. AMYG                                                      |
| Shin et al. (2015)      | CO     | Facial emotion-recognition paradigm                                                      | 40 IU                                              | 45 min         | 32 (16 adult males with schizophrenia and 16 controls) | ↓AMYG (emotional faces) in SCZ, ↑AMYG (emotional faces) in controls                                            |
| Watanabe et al. (2015)  | CO     | Social-judgement task and resting state                                                  | 48 IU/day (2 doses/day) for 6 weeks                | 40 min         | 20 (men with HF ASD)                                   | ↑FC: ACC-dmPFC, ↑ACC, dmPFC                                                                                    |
| Zunhammer et al. (2015) | CO     | Noxious experimental heat                                                                | 32 IU                                              | 40 min         | 30 (men)                                               | ↓AMYG (across temp)                                                                                            |
| Aoki et al. (2014)      | CO, WS | Modified Sally-Anne task                                                                 | 24 IU                                              | 40 min         | 20 (men with ASD)                                      | ↑aINS (inferring others' social emotions)                                                                      |
| Dodhia et al. (2014)    | CO     | Resting state                                                                            | 24 IU                                              | 45 min         | 36 (18 adults with GSAD, 18 controls)                  | ↑FC: bilat. AMYG-ACC/mPFC (in GSAD vs. controls)                                                               |
| Eckstein et al. (2014)  | BS     | Montreal Imaging Stress Task                                                             | 24 IU                                              | 30 min         | 60 (men)                                               | ↑PREC, CC                                                                                                      |
| Riem et al. (2014)      | BS, WS | Adapted RMET                                                                             | 16 IU                                              | 60 min         | 50 (women)                                             | ↑INS, STG (in indiv. with harsh caregiving experiences)                                                        |
| Rilling et al. (2014)   | BS     | Prisoner's dilemma task                                                                  | 24 IU                                              | 43 (40-50) min | 87 (women)                                             | ↓AMYG (recipr. human coop.)                                                                                    |
| Voorhuis et al. (2014)  | BS     | Adapted version of Infant Facial Expression of Emotions from Looking (IFEEL) at Pictures | 16 IU                                              | 50-60 min      | 50 (women)                                             | ↑IFG, MTG, STG                                                                                                 |
| Watanabe et al. (2014)  | WS, CO | Social psychological task                                                                | 24 IU                                              | 40 min         | 40 (men with HF ASD)                                   | ↑mPFC                                                                                                          |
| Watanabe et al. (2014)  | WS, CO | Facial (non)verbal socio-emotional paradigm                                              | 24 IU                                              | 40 min         | 40 (men with HF ASD)                                   | ↑mPFC                                                                                                          |

|                       |        |                                         |                             |        |                                    |                                                                                                                   |
|-----------------------|--------|-----------------------------------------|-----------------------------|--------|------------------------------------|-------------------------------------------------------------------------------------------------------------------|
| Domes et al. (2013)   | WS, CO | Face-matching task, House-matching task | 24 IU                       | 45 min | 28 (14 Asperger, 14 controls)      | ↑AMYG (for faces in AS)                                                                                           |
| Gordon et al. (2013)  | CO     | Modified RMET                           | 12/18/24 IU (age dependent) | 45 min | 17 (children adolescents with ASD) | ↑STR, MFG, SFG, mPFC, OFC, STS; PG, STR, NAcc, Cll, Pons, pCC/PRE, PHC, IPL, STS (↑ for social, ↓ for non-social) |
| Groppe et al. (2013)  | BS     | Social incentive task                   | ~26 IU                      | 30 min | 28 (women)                         | ↑VTA (friendly face= social reward, angry face= social punishment)                                                |
| Scheele et al. (2013) | WS     | Faces of long-term romantic partners    | 24 IU                       | 30 min | 20 (men)                           | ↑VTA, NAcc (partner vs. unfamiliar), ↑INAcc (partner vs. familiar women)                                          |

*Note.* \*Unless specified otherwise, subjects are healthy adults (men and women). *IU*: International Units in total. *min*: minutes. *BS*: Between-subject. *WS*: Within-subject. *CO*: Cross-over. *ASD*: Autism Spectrum Disorder. *Occ*: occipital. *mOFC*: medial orbitofrontal cortex. *INS*: Insula. *AMYG*: amygdala. *HPPC*: hippocampus. *mPFC*: medial prefrontal cortex. *Oxy*: Oxytocin. *Plc*: Placebo. *M*: Male. *F*: Female. *CC*: cingulate cortex. *FC*: functional connectivity. *PTSD*: post-traumatic stress disorder. *STR*: striatum. *ACC*: anterior cingulate cortex. *HF ASD*: high-functioning autism. *vmPFC*: ventromedial prefrontal cortex. *NAA*: N-Acetyl-Aspartate. *PFC*: prefrontal cortex. *CPU*: Caudate/putamen. *vCN*: ventral caudate nucleus. *PREC*: precuneus. *bilat*: bilateral. *aINS*: anterior INS. *GSAD*: Generalised Social Anxiety Disorder. *STG*: superior temporal gyrus. *IFG*: inferior frontal gyrus. *MTG*: middle temporal gyrus. *RMET*: Reading the Mind in the Eyes Task. *pCC*: posterior cingulate cortex. *PHC*: parahippocampus. *IPL*: inferior parietal lobe. *STS*: superior temporal sulcus. *VTA*: ventral tegmental area. *NAcc*: Nucleus Accumbens.

**Table S2.** Cluster peaks of regions from main effects analysis of the biological motion perception and affective voice perception tasks, indicating regions where the experimental condition of interest showed a significantly attenuated deactivation under OT than PLC.

| Site                                     | Hem | x  | y   | z  | Z    | k    |
|------------------------------------------|-----|----|-----|----|------|------|
| <u>Biological motion: BIO &gt; SCRAM</u> |     |    |     |    |      |      |
| Supracalcarine cortex                    | L   | -2 | -84 | 10 | 3.45 | 752  |
| <u>Affective voices: ANG &gt; HAP</u>    |     |    |     |    |      |      |
| Precuneus                                | R   | 10 | -54 | 24 | 4.01 | 1231 |
| Fornix                                   | R   | 28 | -34 | 4  | 3.65 |      |
| Callosal body                            | R   | 24 | -38 | 26 | 3.59 |      |
| Optic radiation                          | R   | 28 | -72 | 16 | 3.65 | 711  |
| Superior parietal lobule                 | R   | 30 | -66 | 58 | 3.48 |      |

*Note.* MNI coordinates reported. *Hem*: hemisphere. *Z*: z-statistic. *k*: voxel extent.

**Table S3.** Cluster peaks and local maxima of regions with significant response to the BIO > SCRAM contrast, under OT alone and under PLC alone.

| Site                            | Hem | x   | y    | z   | Z    | k    |
|---------------------------------|-----|-----|------|-----|------|------|
| <u>BIO &gt; SCRAM under OT</u>  |     |     |      |     |      |      |
| Cuneal Cortex                   | --  | -4  | -82  | 20  | 4.33 | 1445 |
| Supracalcarine Cortex           | --  | -2  | -86  | 10  | 3.69 | --   |
| Intracalcarine Cortex           | L   | -14 | -72  | 10  | 3.62 | --   |
| Middle Temporal Gyrus           | L   | -58 | -58  | 8   | 4.68 | 815  |
| Lateral Occipital Cortex        | L   | -60 | -68  | 6   | 4.54 | --   |
| Supplementary Motor Cortex      | R   | 10  | -14  | 46  | 3.8  | 768  |
| Postcentral Gyrus               | R   | 24  | -36  | 56  | 3.73 | --   |
| Cingulate Gyrus                 | L   | -12 | -18  | 38  | 3.67 | --   |
| Precentral Gyrus                | --  | 4   | -30  | 54  | 3.64 | --   |
| Supramarginal Gyrus             | R   | 64  | -34  | 30  | 4.65 | 573  |
| <u>BIO &gt; SCRAM under PLC</u> |     |     |      |     |      |      |
| Supramarginal Gyrus             | R   | 54  | -38  | 16  | 4    | 848  |
| Inferior parietal lobule        | R   | 68  | -34  | 26  | 3.81 | --   |
| Parietal Operculum Cortex       | R   | 50  | -32  | 30  | 3.79 | --   |
| Brainstem                       | R   | 8   | -34  | -2  | 3.91 | 752  |
| Amygdala                        | R   | 26  | -2   | -18 | 3.72 | --   |
| Thalamus                        | R   | 12  | -36  | 0   | 3.56 | --   |
| Supramarginal Gyrus             | L   | -58 | -32  | 50  | 3.91 | 597  |
| Occipital Pole                  | R   | 36  | -94  | 0   | 4.35 | 443  |
| Occipital Pole                  | L   | -28 | -100 | -2  | 3.82 | 359  |
| Lateral Occipital Cortex        | L   | -38 | -90  | -10 | 3.63 | --   |
| Lateral Occipital Cortex        | L   | -56 | -64  | 4   | 3.72 | 320  |

Note. MNI coordinates reported. *Hem*: Hemisphere. *L*: Left. *R*: Right.

**Table S4.** Cluster peaks and local maxima of regions with significant response to either the HAP > ANG or ANG > HAP contrast, under OT alone and under PLC alone.

| Site                          | Hem | x   | y   | z   | Z    | k    |
|-------------------------------|-----|-----|-----|-----|------|------|
| <u>HAP &gt; ANG under OT</u>  |     |     |     |     |      |      |
| Planum Temporale              | R   | 58  | -20 | 12  | 4.29 | 1486 |
| Superior Temporal Gyrus       | R   | 64  | -16 | 2   | 4.2  | --   |
| Heschl's Gyrus                | L   | -44 | -28 | 12  | 4.3  | 722  |
| Planum Temporale              | L   | -64 | -28 | 14  | 3.91 | --   |
| Parietal Operculum Cortex     | L   | -48 | -30 | 14  | 3.9  | --   |
| Superior Temporal Gyrus       | L   | -68 | -22 | 8   | 3.71 | --   |
| <u>HAP &gt; ANG under PLC</u> |     |     |     |     |      |      |
| Lateral occipital cortex      | R   | 28  | -68 | 56  | 3.84 | 895  |
| Superior parietal lobule      | R   | 24  | -50 | 56  | 3.6  | --   |
| <u>ANG &gt; HAP under OT</u>  |     |     |     |     |      |      |
| Callosal body                 | L   | -28 | -56 | 12  | 3.68 | 937  |
| Optic radiation               | L   | -28 | -66 | 6   | 3.55 | --   |
| Temporal occipital fusiform   | L   | -34 | -52 | -8  | 3.43 | --   |
| Precuneus                     | R   | 10  | -52 | 22  | 3.48 | 662  |
| Callosal body                 | R   | 22  | -46 | 10  | 3.43 | --   |
| Premotor cortex               | R   | 32  | -16 | 54  | 3.37 | --   |
| Hippocampus                   | R   | 28  | -18 | -12 | 3.63 | 487  |
| Amygdala                      | R   | 22  | -4  | -20 | 3.54 | --   |
| <u>ANG &gt; HAP under PLC</u> |     |     |     |     |      |      |
| <i>n.s.</i>                   |     |     |     |     |      |      |

Note. MNI coordinates reported. *Hem*: Hemisphere. *L*: Left. *R*: Right. *n.s.*: Non-significant



**Table S5.** Cluster peaks and local maxima of regions that demonstrated significantly greater activation under OT than PLC for both HAP > fixation and ANG > fixation.

| Site                    | Hem | x   | y   | z  | Z    | k    |
|-------------------------|-----|-----|-----|----|------|------|
| Planum temporale        | L   | -44 | -32 | 8  | 3.80 | 1287 |
| Superior temporal gyrus | L   | -64 | -20 | 4  | 3.67 | --   |
| Superior temporal gyrus | R   | 46  | -30 | 4  | 4.00 | 1055 |
| Supramarginal gyrus     | R   | 58  | -40 | 16 | 3.88 | --   |
| Heschl's gyrus          | R   | 56  | -14 | 8  | 3.79 | --   |

*Note.* MNI coordinates reported. *Hem*: hemisphere. *Z*: z-statistic. *k*: voxel extent.

**Table S6.** Local maxima resulting from PPI analysis of the affective voices task, indicating regions where HAP > ANG connectivity was greater under OT than PLC.

| Seed       | Site                          | Hem | x   | y   | z   | Z    | k    |
|------------|-------------------------------|-----|-----|-----|-----|------|------|
| Left NAcc  | Precuneus                     | --  | 6   | -52 | 62  | 3.52 | 2825 |
|            | Sup. lateral occipital cortex | R   | 14  | -66 | 54  | 3.36 | --   |
|            | Sup. parietal lobule          | L   | -26 | -58 | 62  | 3.31 | --   |
|            | Postcentral gyrus             | L   | -28 | -36 | 64  | 3.29 | --   |
|            | Ant. supramarginal gyrus      | L   | -66 | -26 | 34  | 3.29 | 563  |
|            | Heschl's gyrus                | L   | -50 | -18 | 8   | 3.27 | --   |
|            | Planum temporale              | L   | -52 | -30 | 10  | 3.19 | --   |
|            | Parietal operculum            | L   | -62 | -28 | 18  | 3.19 | --   |
|            | Postcentral gyrus             | L   | -60 | -22 | 36  | 3.17 | --   |
|            | Cuneus                        | --  | -2  | -84 | 30  | 3.30 | 361  |
|            | Occipital pole                | R   | 16  | -94 | 26  | 3.29 | --   |
|            | Crus I                        | R   | 42  | -52 | -26 | 3.32 | 273  |
| Right NAcc | Temporo-occipital fusiform    | R   | 26  | -48 | -18 | 3.29 | --   |
|            | Sup. lateral occipital cortex | R   | 26  | -68 | 56  | 3.26 | 903  |
|            | Pos. supramarginal gyrus      | R   | 50  | -42 | 60  | 3.21 | --   |
|            | Precuneus                     | --  | 4   | -70 | 50  | 3.10 | --   |
|            | Middle frontal gyrus          | R   | 30  | 6   | 62  | 3.24 | 432  |
|            | Sup. frontal gyrus            | R   | 26  | 22  | 58  | 3.20 | --   |
|            | Planum temporale              | L   | -62 | -34 | 18  | 3.19 | 372  |
|            | Ant. supramarginal gyrus      | L   | -62 | -28 | 20  | 3.16 | --   |
|            | Parietal operculum            | L   | -58 | -32 | 18  | 3.11 | --   |
|            | Postcentral gyrus             | L   | -62 | -24 | 42  | 3.08 | --   |
|            | Intracalcarine cortex         | R   | 10  | -88 | 2   | 3.28 | 338  |
|            | Lingual gyrus                 | R   | 12  | -86 | -2  | 3.25 | --   |
|            | Occipital pole                | --  | 4   | -90 | 0   | 3.21 | --   |
|            | Angular gyrus                 | R   | 54  | -48 | 30  | 3.45 | 337  |
| Left Amyg  | Occipital Pole                | --  | -8  | -92 | 8   | 3.28 | 704  |
|            | Supracalcarine Cortex         | --  | 4   | -86 | 8   | 3.23 | --   |
|            | Intracalcarine Cortex         | R   | 10  | -82 | 6   | 3.17 | --   |
| Right Amyg | Precuneus                     | --  | 6   | -60 | 12  | 3.33 | 1015 |
|            | Occipital Pole                | R   | 12  | -98 | 4   | 3.25 | --   |
|            | Supracalcarine Cortex         | --  | 2   | -80 | 10  | 3.21 | --   |

Note. MNI coordinates are reported. Hem: Hemisphere. L: Left. R: Right. Z: Z-statistic. k: Voxel extent. Ant: Anterior. Sup: Superior. Post: Posterior. Amyg: Amygdala. NAcc: Nucleus accumbens.

**Table S7.** Regions where HAP > ANG PPI values were associated with social symptom severity as measured by SRS total *t* score.

| Seed                         | Site                              | Hem | x   | y   | z   | Z    | k   |
|------------------------------|-----------------------------------|-----|-----|-----|-----|------|-----|
| <u>Positive associations</u> |                                   |     |     |     |     |      |     |
| Left NAcc                    | Ant. Temporal Fusiform Cortex     | R   | 36  | -6  | -40 | 3.54 | 732 |
|                              | Temporal Pole                     | L   | -42 | 14  | -26 | 3.34 | 651 |
| R NAcc                       | Ant. Inferior Temporal Gyrus      | R   | 40  | -2  | -38 | 3.48 | 985 |
|                              | Ant. Temporal Fusiform Cortex     | L   | -30 | -2  | -36 | 3.36 | 386 |
|                              | Frontal Medial Cortex             | L   | -10 | 36  | -22 | 3.22 | 287 |
| R Amyg                       | Inferior Lateral Occipital Cortex | L   | -46 | -76 | -12 | 3.92 | 341 |
|                              | Frontal Medial Cortex             | --  | 0   | 36  | -22 | 3.36 | 312 |
| <u>Negative associations</u> |                                   |     |     |     |     |      |     |
| n.s.                         |                                   |     |     |     |     |      |     |

*Note.* MNI coordinates are reported. *Hem*: Hemisphere. *L*: Left. *R*: Right. *Z*: Z-statistic. *k*: Voxel extent. *Ant*: Anterior. *Amyg*: Amygdala. *NAcc*: Nucleus accumbens.

**Table S8.** Regions where HAP > ANG PPI values were associated with social symptom severity as measured by ADI-R diagnostic algorithm A, “Qualitative Abnormalities in Reciprocal Social Interaction.”

| Seed                         | Site                       | Hem | x   | y   | z   | Z    | k    |
|------------------------------|----------------------------|-----|-----|-----|-----|------|------|
| <u>Positive associations</u> |                            |     |     |     |     |      |      |
| Left NAcc                    | Frontal Pole               | R   | 24  | 42  | 38  | 3.92 | 279  |
| R NAcc                       | Frontal Pole               | R   | 24  | 44  | 38  | 3.8  | 491  |
| <u>Negative associations</u> |                            |     |     |     |     |      |      |
| Left NAcc                    | vmPFC                      | R   | 8   | 26  | -16 | 3.69 | 722  |
|                              | Ant. Parahippocampal Gyrus | L   | -28 | -16 | -32 | 3.43 | 379  |
| Left Amyg                    | vmPFC                      | L   | -2  | 36  | -12 | 3.48 | 1294 |

*Note.* MNI coordinates are reported. *Hem*: Hemisphere. *L*: Left. *R*: Right. *Z*: Z-statistic. *k*: Voxel extent. *Ant*: Anterior. *Amyg*: Amygdala. *NAcc*: Nucleus accumbens. *vmPFC*: ventromedial prefrontal cortex.

**Table S9.** Detailed summary of the types of medication used by participants in the full sample and the subsamples analyzed for the biological motion perception and affective voice perception tasks.

|                                 | Full Sample   | Biological Motion | Affective Voices |
|---------------------------------|---------------|-------------------|------------------|
|                                 | <i>N</i> = 20 | <i>n</i> = 14     | <i>n</i> = 16    |
| Alpha agonist                   | 2             | 2                 | 2                |
| Anticonvulsant/mood stabilizer  | 1             | 1                 | 1                |
| Anti-inflammatory               | 2             | 2                 | 2                |
| Antihistamine                   | 2             | 1                 | 1                |
| Antipsychotic/anti-irritability | 5             | 4                 | 4                |
| Growth hormone                  | 1             | 1                 | 0                |
| Inhaled corticosteroid          | 1             | 0                 | 1                |
| SNRI                            | 1             | 1                 | 1                |
| SSRI                            | 3             | 3                 | 3                |
| Stimulant                       | 3             | 2                 | 3                |

*Note.* *Alpha agonists:* guanfacine, clonidine. *Anticonvulsant/mood stabilizer:* lamotrigine. *Anti-inflammatory:* montelukast. *Antihistamines:* fexofenadine, cetirizine. *Antipsychotic/anti-irritability drugs:* aripiprazole, risperidone. *Growth hormone:* somatropin. *Inhaled corticosteroid:* mometasone. *SNRI (serotonin-norepinephrine reuptake inhibitor):* venlafaxine. *SSRIs (selective serotonin reuptake inhibitors):* fluoxetine, sertraline. *Stimulants:* amphetamine/dextroamphetamine, dexmethylphenidate, lisdexamfetamine.

**Figure S1.** Brain regions in which activation was significantly higher while viewing coherent (BIO) versus scrambled (SCRAM) biological motion, under either **A**) oxytocin (OXT) only, or **B**) placebo (PLC) only. Z-statistic maps are overlaid on the MNI standard template in radiological orientation, with every other axial slice depicted from  $z = 0$  to  $z = 94$ .

A. BIO > SCRAM: OXT

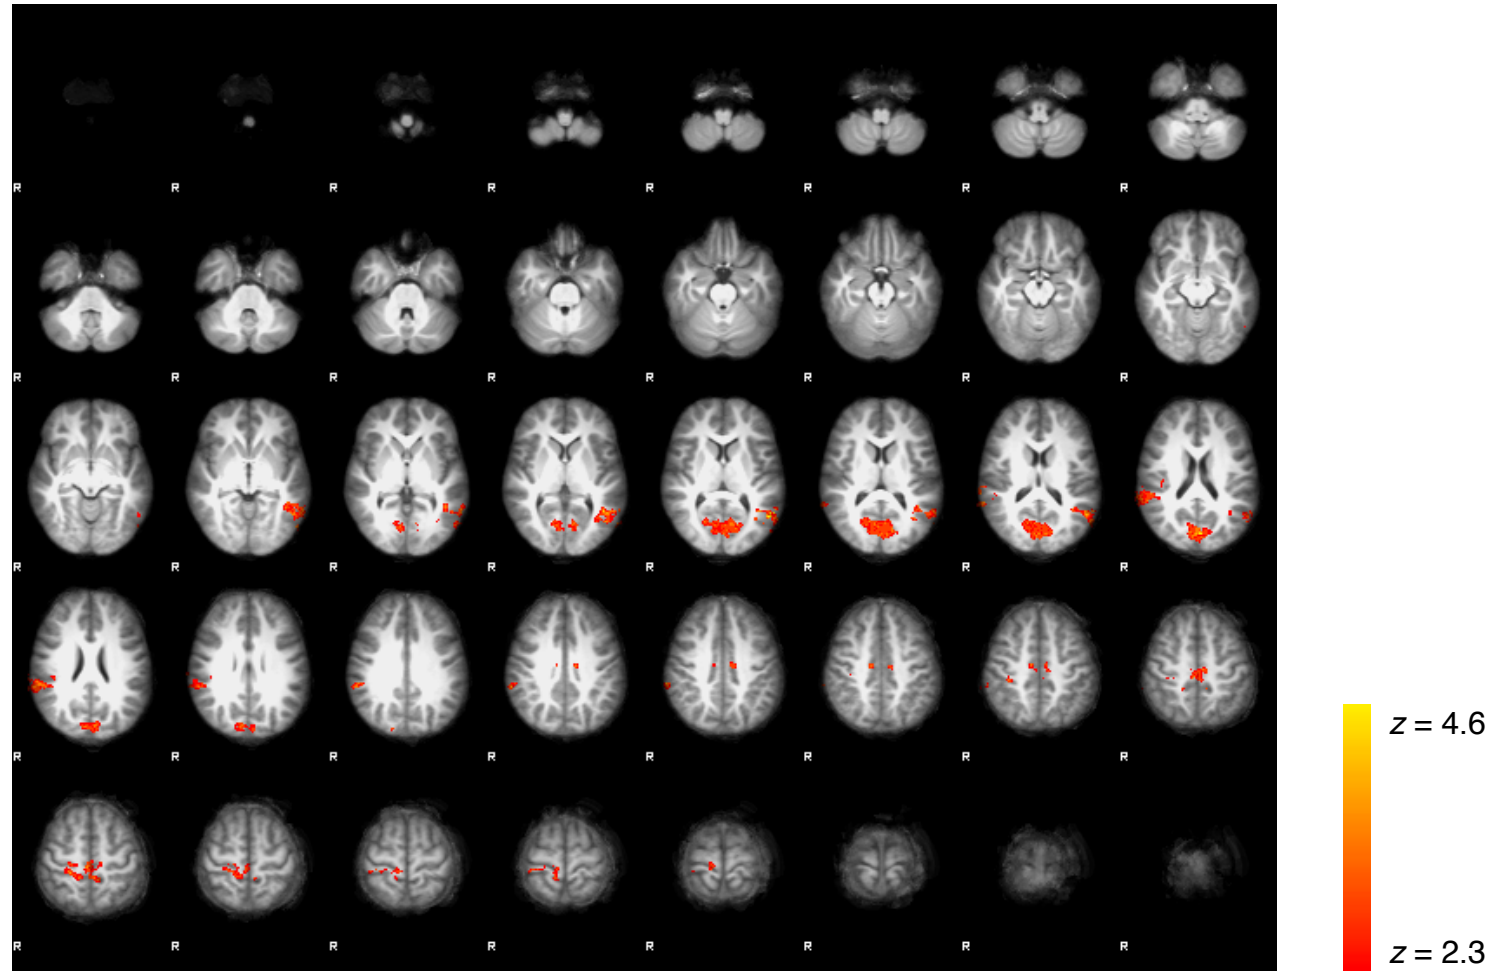

B. BIO > SCRAM: PLC

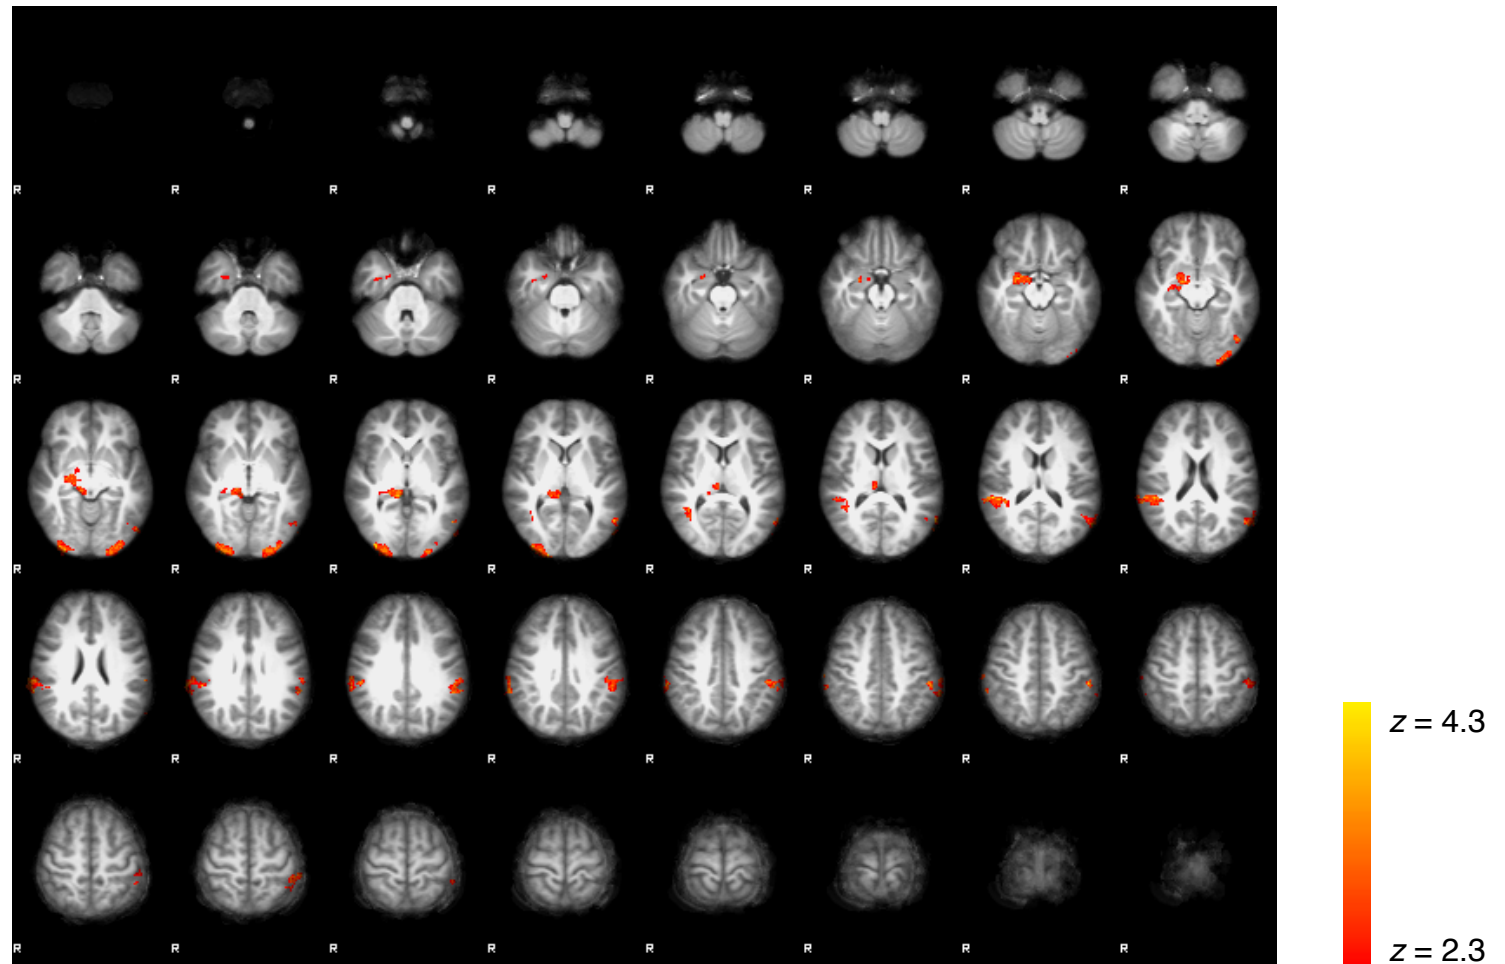

**Figure S2.** Brain regions in which activation was significantly higher while listening to happy (HAP) versus angry (ANG) vocal stimuli, under either **A)** oxytocin (OXT) only, or **B)** placebo (PLC) only. Z-statistic maps are overlaid on the MNI standard template in radiological orientation, with every other axial slice depicted from  $z = 0$  to  $z = 78$ .

**A. HAP > ANG: OXT**

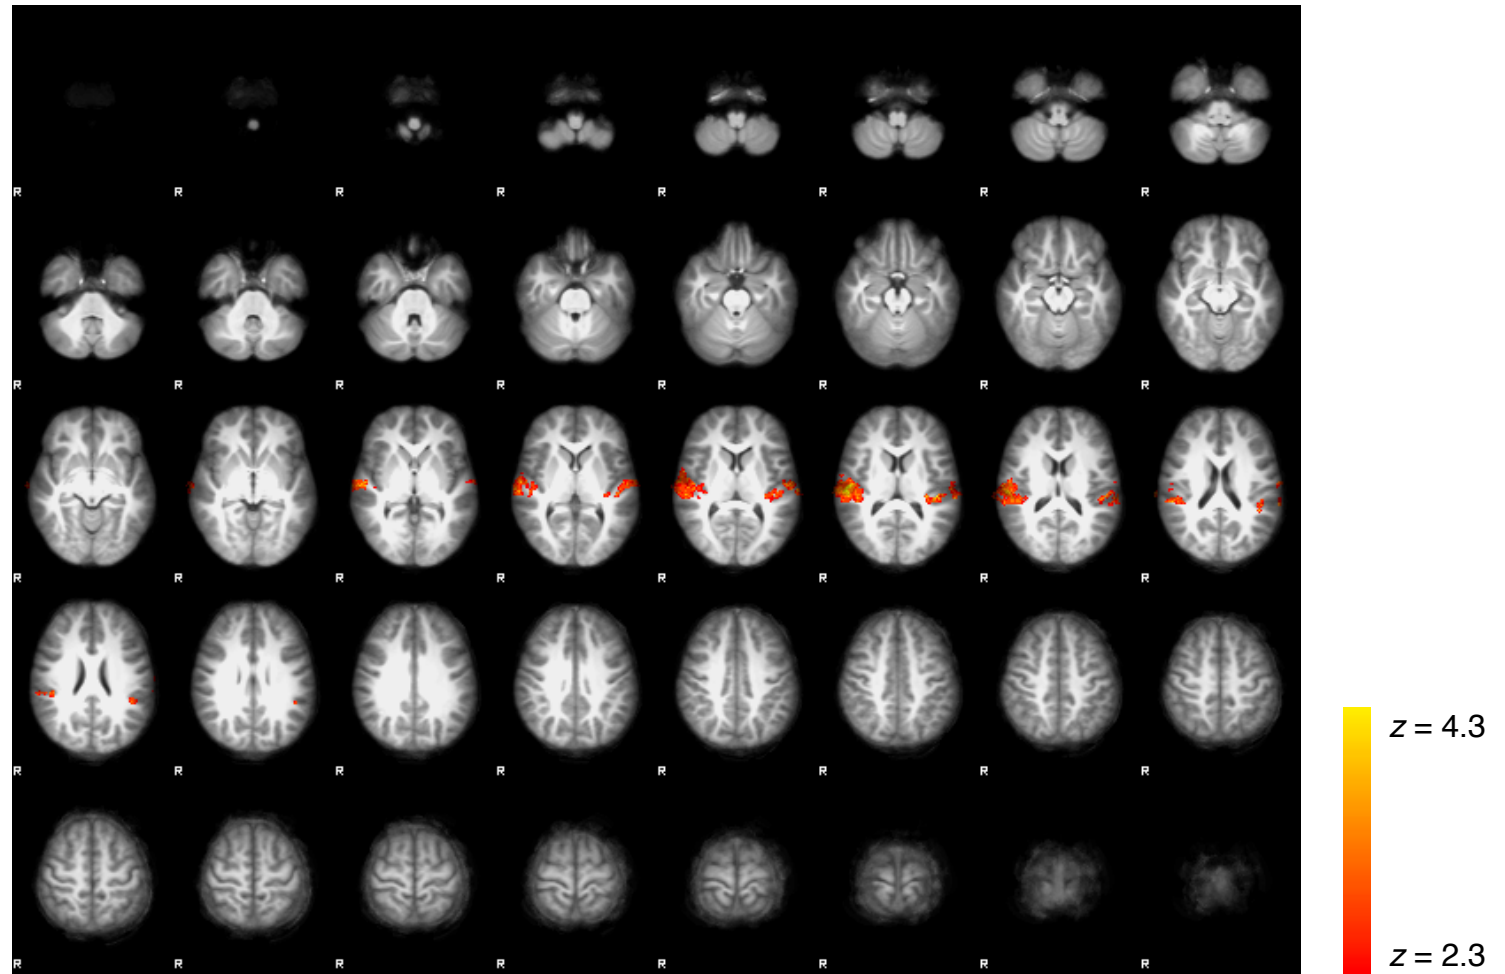

**B. HAP > ANG: PLC**

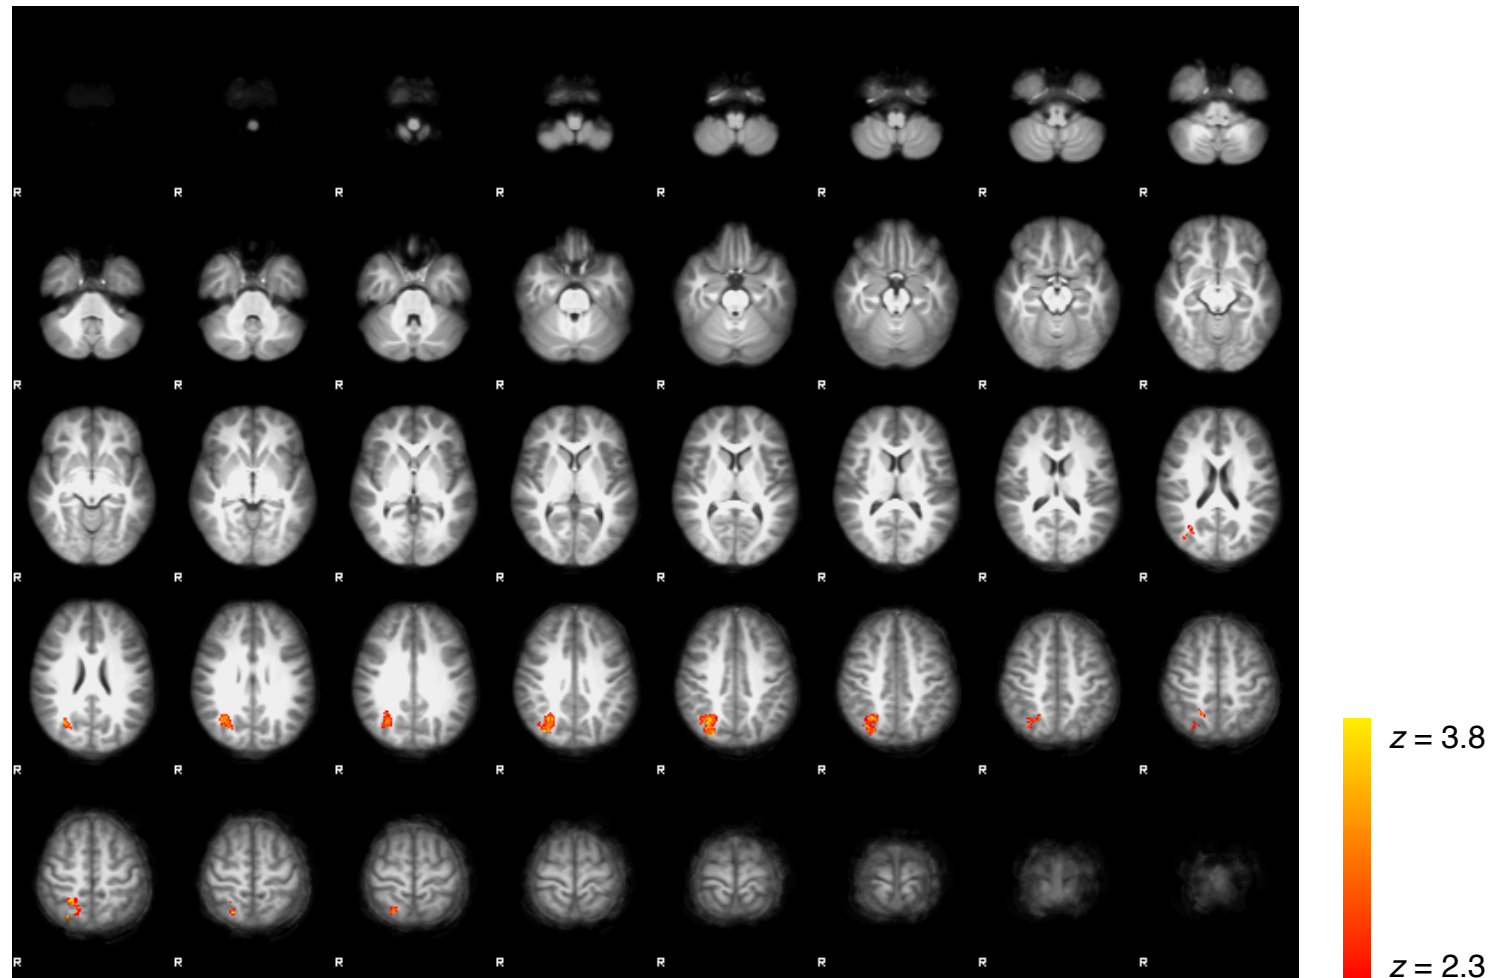

**Figure S3.** Brain regions in which activation was significantly higher while listening to angry (ANG) versus happy (HAP) vocal stimuli, under oxytocin (OXT) only. Z-statistic maps are overlaid on the MNI standard template in radiological orientation, with every other axial slice depicted from  $z = 0$  to  $z = 78$ .

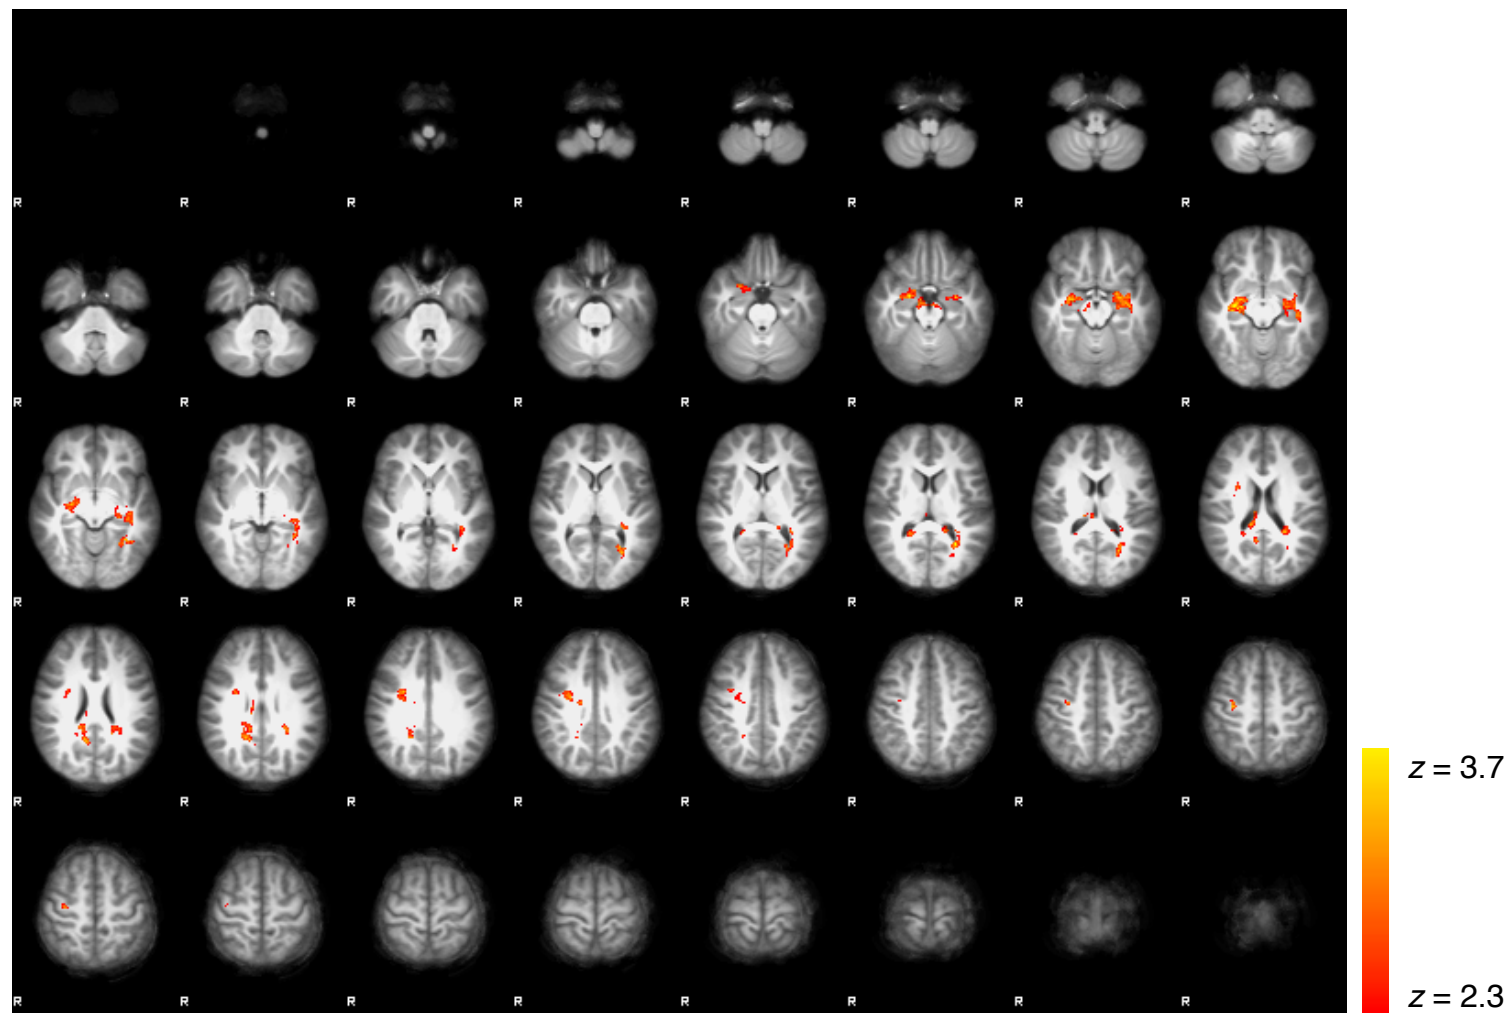



**Figure S4.** Results of conjunction analysis, indicating regions with significantly greater response to both ANG > fixation and HAP > fixation under oxytocin than placebo. Z-statistic maps are overlaid on the MNI template in radiological orientation.

Z = 2.3  4.0

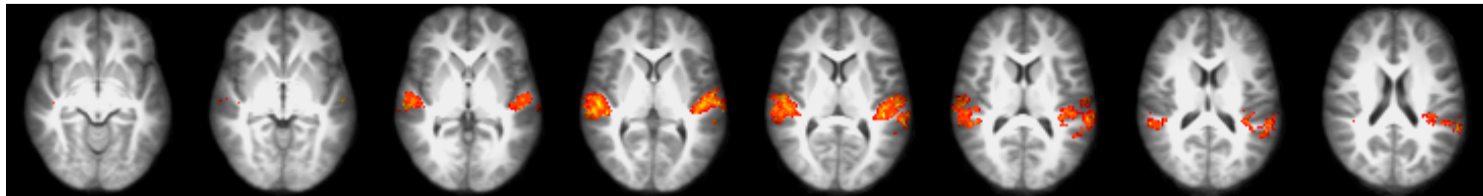

z 32

34

36

38

40

42

44

46
